# Supplementary material
Source: PubMed Central journal article supplement (PMC6865784)

## Supplementary Online Content

Fumagalli C, Maurizi N, Day SM, et al; SHARE Investigators. Association of obesity with adverse long-term outcomes in hypertrophic cardiomyopathy. *JAMA Cardiol*. Published online November 6, 2019. doi:10.1001/jamacardio.2019.4268

**eTable 1.** Baseline clinical characteristics of patients with 1 year or more of follow-up by BMI category with pathogenic/likely pathogenic variants

**eTable 2.** Clinical outcomes of patients with 1 year or more of follow-up by BMI category

**eTable 3.** Cox multivariable regression models for patients with pathogenic/likely pathogenic variants with 1 or more years of follow-up

**eTable 4.** Cox multivariable regression model for the overall composite end point for patients who performed a genetic test and had a single pathogenic/likely pathogenic mutation or were genotype negative with 1 year or more of follow-up

**eFigure.** Flow diagram summarizing patient selection in SHARE (March 2018 registry update)

This supplementary material has been provided by the authors to give readers additional information about their work.

**eTable 1.** Baseline clinical characteristics of patients with 1 year or more of follow-up by BMI category with pathogenic/likely pathogenic variants

|                                     | BMI Category<br>P/LP |                   |                   |                   | p      |
|-------------------------------------|----------------------|-------------------|-------------------|-------------------|--------|
|                                     | Overall              | <25               | 25-30             | >30               |        |
|                                     | <b>1035</b>          | <b>358 (34.6)</b> | <b>418 (40.4)</b> | <b>259 (25.0)</b> |        |
| <b>Demographics</b>                 |                      |                   |                   |                   |        |
| US SHaRE Site, n (%)                | 440 (43)             | 103 (29)          | 170 (41)          | 167 (65)          | <0.001 |
| Age at Diagnosis                    | 42±15                | 40±15             | 43±14             | 43±13             | 0.006  |
| BMI                                 | 28±5                 | 23±2              | 27±1              | 34±5              | <0.001 |
| Gender (men), n (%)                 | 598 (58)             | 182 (51)          | 274 (66)          | 142 (55)          | <0.001 |
| <b>Race</b>                         |                      |                   |                   |                   |        |
| White, n (%)                        | 896 (87)             | 308 (86)          | 369 (88)          | 219 (85)          | 0.008  |
| Black, n (%)                        | 24 (2.3)             | 4 (1.1)           | 7 (1.7)           | 13 (5.0)          |        |
| Asian, n (%)                        | 18 (1.7)             | 11 (3.1)          | 5 (1.2)           | 2 (0.8)           |        |
| Other, n (%)                        | 97 (9.4)             | 35 (9.8)          | 37 (8.9)          | 25 (9.7)          |        |
| <b>NYHA</b>                         |                      |                   |                   |                   |        |
| III/IV, n (%)                       | 118 (11)             | 32 (9)            | 38 (9)            | 48 (19)           | <0.001 |
| Hypertension, n (%)                 | 278 (27)             | 65 (18)           | 102 (24)          | 111 (43)          | <0.001 |
| Diabetes, n (%)                     | 61 (5.8)             | 11 (3.1)          | 14 (3.3)          | 36 (13.8)         | <0.001 |
| SCD Family History, n (%)           | 266 (26)             | 87 (24)           | 103 (25)          | 76 (29)           | 0.325  |
| <b>Echocardiographic parameters</b> |                      |                   |                   |                   |        |
| LAD, mm                             | 45±10                | 42±10             | 46±10             | 47±9              | <0.001 |
| MAX LVWT, mm                        | 20±6                 | 20±6              | 20±5              | 20±6              | 0.839  |
| LVEF                                | 65±9                 | 64±10             | 65±9              | 66±9              | 0.026  |
| LVOTO at Rest                       | 12 [6-28]            | 12 [5-21]         | 10 [6-25]         | 16 [7-58]         | 0.001  |
| LVOTO Valsalva                      | 18 [8-61]            | 15 [8-48]         | 16 [7-54]         | 35 [10-100]       | <0.001 |
| Obstruction, n (%)                  | 195 (19)             | 62 (17)           | 73 (18)           | 60 (23)           | 0.084  |

BMI: Body Mass Index; NYHA: New York Heart Association Functional Class; P/LP: Pathogenic/Likely Pathogenic; VUS: Variant of Unknown Significance; SCD: Sudden Cardiac Death; LAD: Left atrial diameter; LVWT: Left ventricle wall thickness; LVEF: Left ventricle ejection fraction, LVOTO: Left ventricle outflow tract obstruction.

**eTable 2.** Clinical outcomes of patients with 1 year or more of follow-up by BMI category

|                                                                                                                                                                         | BMI Category |                   |                   |                   | P      |
|-------------------------------------------------------------------------------------------------------------------------------------------------------------------------|--------------|-------------------|-------------------|-------------------|--------|
|                                                                                                                                                                         | Overall      | <25               | 25-30             | >30               |        |
|                                                                                                                                                                         | <b>1035</b>  | <b>358 (34.6)</b> | <b>418 (40.4)</b> | <b>259 (25.0)</b> |        |
| <b>Demographics</b>                                                                                                                                                     |              |                   |                   |                   |        |
| Age at last visit                                                                                                                                                       | 51±15        | 50±16             | 51±15             | 53±13             | 0.014  |
| Follow-Up                                                                                                                                                               | 12±10        | 13±11             | 12±9              | 11±10             | 0.082  |
| NYHA III/IV*, n (%)                                                                                                                                                     | 116 (11)     | 35 (10)           | 41 (10)           | 40 (15)           | 0.038  |
| SRT, n (%)                                                                                                                                                              | 228 (22)     | 60 (17)           | 89 (21)           | 79 (31)           | <0.001 |
| NYHA III/IV*                                                                                                                                                            | 39 (17)      | 8 (13)            | 14 (16)           | 17 (22)           | 0.197  |
| ICD, n (%)                                                                                                                                                              | 328 (32)     | 107 (30)          | 120 (29)          | 101 (39)          | 0.013  |
| Appropriate Discharge                                                                                                                                                   | 47 (14)      | 16 (15)           | 19 (16)           | 12 (12)           | 0.804  |
| <b>Clinical outcomes</b>                                                                                                                                                |              |                   |                   |                   |        |
| Atrial Fibrillation, n (%)                                                                                                                                              | 311 (30)     | 102 (28)          | 120 (29)          | 89 (34)           | 0.136  |
| Syncope, n (%)                                                                                                                                                          | 149 (14)     | 63 (18)           | 57 (14)           | 29 (11)           | 0.025  |
| TIA/Stroke, n (%)                                                                                                                                                       | 17 (1.7)     | 4 (1.1)           | 3 (0.7)           | 10 (3.8)          | 0.003  |
| Death, n (%)                                                                                                                                                            | 91 (8.8)     | 43 (12.0)         | 28 (6.7)          | 20 (7.7)          | 0.026  |
| CVD, n (%)                                                                                                                                                              | 54 (5.2)     | 24 (6.7)          | 18 (4.3)          | 12 (4.6)          | 0.243  |
| Composite HF, n (%)                                                                                                                                                     | 244 (24)     | 71 (20)           | 79 (19)           | 94 (36)           | <0.001 |
| Composite Overall, n (%)                                                                                                                                                | 477 (46)     | 148 (41)          | 182 (44)          | 147 (57)          | <0.001 |
| Composite Arrhythmia, n (%)                                                                                                                                             | 89 (9)       | 35 (9.8)          | 28 (6.7)          | 26 (10)           | 0.198  |
| * = at last contact, BMI: Body Mass Index; NYHA: New York Heart Association Functional Class; P/LP: Pathogenic/Likely Pathogenic; VUS: Variant of Unknown Significance. |              |                   |                   |                   |        |

**eTable 3.** Cox multivariable regression models for patients with pathogenic/likely pathogenic variants with 1 or more years of follow-up

|                                                  | Composite Overall |             |        | HF-Composite |             |        | Atrial Fibrillation |             |        |
|--------------------------------------------------|-------------------|-------------|--------|--------------|-------------|--------|---------------------|-------------|--------|
|                                                  | HR                | 95% C.I.    | p      | HR           | 95% C.I.    | p      | HR                  | 95% C.I.    | p      |
| <b>BMI</b>                                       |                   |             | 0.004  |              |             | <0.001 |                     |             |        |
| 25-30 vs <25                                     | 1.104             | 0.840-1.470 |        | 1.044        | 0.712-1.529 |        |                     |             |        |
| >30 vs <25                                       | 1.557             | 1.180-2.091 |        | 1.784        | 1.237-2.571 |        |                     |             |        |
| <b>Age at Diagnosis</b>                          | 1.042             | 1.033-1.051 | <0.001 | 1.037        | 1.025-1.049 | <0.001 | 1.040               | 1.028-1.053 | <0.001 |
| <b>Gender (men vs. women)</b>                    |                   |             |        | 0.761        | 0.561-1.031 | 0.078  |                     |             |        |
| <b>LAD, mm</b>                                   | 1.019             | 1.009-1.030 | <0.001 | 1.023        | 1.011-1.037 | <0.001 | 1.032               | 1.020-1.044 | <0.001 |
| <b>Obstruction (yes vs. no)</b>                  | 1.812             | 1.429-2.297 | <0.001 | 2.414        | 1.767-3.299 | <0.001 | 1.509               | 1.076-2.115 | 0.017  |
| BMI: Body Mass Index; LAD: Left Atrial Diameter. |                   |             |        |              |             |        |                     |             |        |

**eTable 4.** Cox multivariable regression model for the overall composite end point for patients who performed a genetic test and had a single pathogenic/likely pathogenic mutation or were genotype negative with 1 year or more of follow-up

|                                 | Composite Overall |             |        |
|---------------------------------|-------------------|-------------|--------|
|                                 | HR                | 95% C.I.    | p      |
| <b>BMI</b>                      |                   |             | 0.001  |
| 25-30 vs <25                    | 1.075             | 0.866-1.335 |        |
| >30 vs <25                      | 1.659             | 1.324-2.078 |        |
| <b>P/LP vs Genotype (-)</b>     | 1.223             | 1.020-1.467 | 0.030  |
| <b>Age at Diagnosis</b>         | 1.043             | 1.036-1.050 | <0.001 |
| <b>LAD, mm</b>                  | 1.023             | 1.015-1.031 | <0.001 |
| <b>Obstruction (yes vs. no)</b> | 1.612             | 1.348-1.929 | <0.001 |

BMI: Body Mass Index; P/LP: Pathogenic/Likely Pathogenic gene variants; LAD: Left Atrial Diameter.

**eFigure.** Flow diagram summarizing patient selection in SHARE (March 2018 registry update)

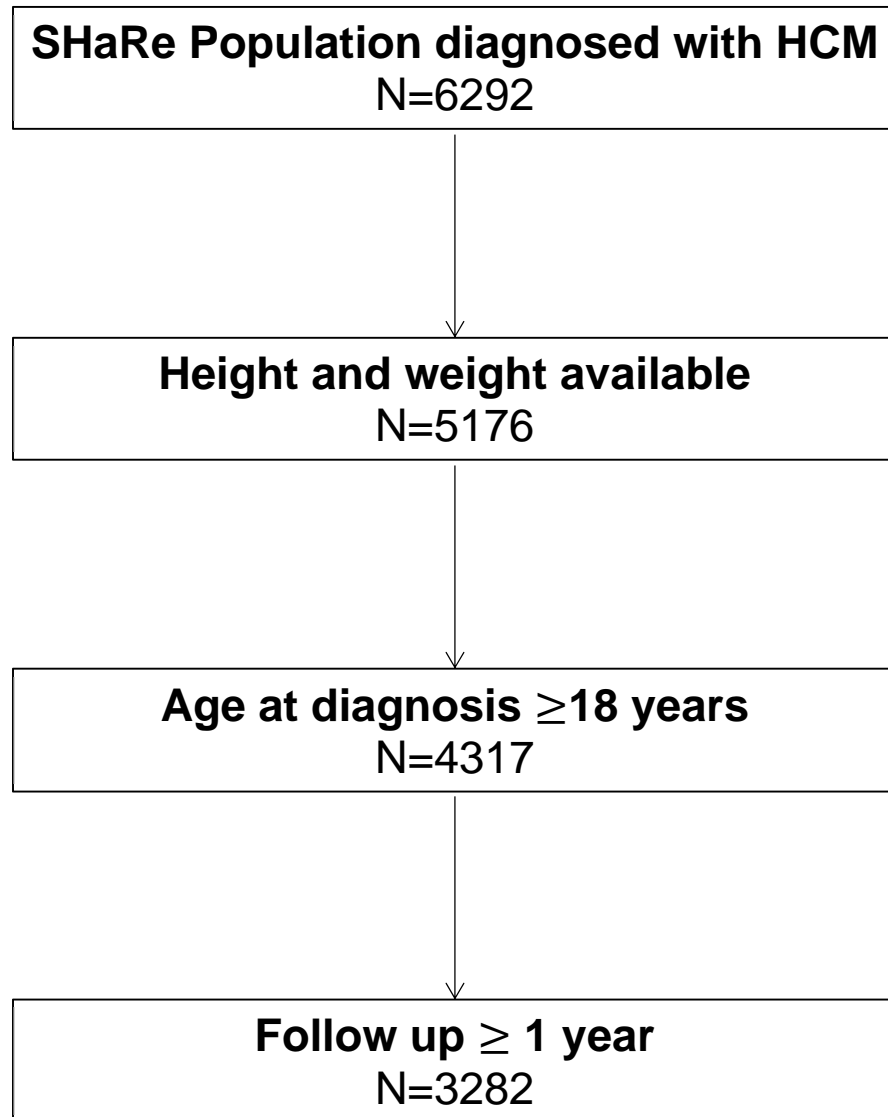

Supplement: jamacardiol-5-65-s001.pdf [file jamacardiol-5-65-s001.pdf]
